# Supplementary material for: LegacyPollen 1.0: A taxonomically harmonized global Late Quaternary pollen dataset of 2831 records with standardized chronologies
Source: Copernicus journal article supplement (doi:10.5194/essd-2022-37), 2022-03-01
Supplement: Supplementary file [file essd-2022-37-AC1-supplement.pdf]

**Response letter of 'LegacyPollen 1.0: A taxonomically harmonized global Late Quaternary pollen dataset of 2831 records with standardized chronologies'**

**Response to comments of Anonymous Referee #1**

**Reviewer comment:** *This dataset has valuable contribution to synthesize pollen data from all over the world, and it will benefit the further studies on changes of vegetation ecology and its driving forces, the climate change and/or human impacts at large spatial scales. It has done a lot of work on harmonizing the taxa name into one tenth of its original taxa, and the authors have corrected some wrong taxa names and calibrated the chronology with a standard method. Considering its potential contribution and careful descriptions on the dataset, I recommend it for publication as the present form.*

**Response:** **Thanks for your review and recommendation.**
